# Supplementary material
Source: Springer Nature journal article supplement (https://www.springerprofessional.de/resource/supplementary/13638_2011_314_MOESM18_ESM.pdf/11897560)

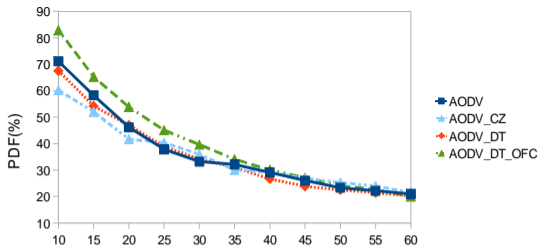

N° Connections  
(a)

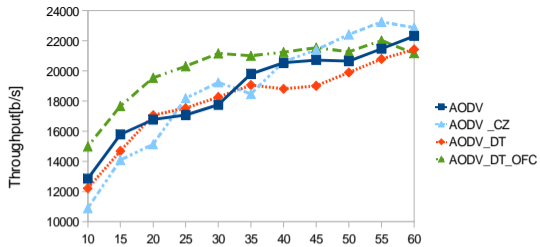

N° Connections  
(b)

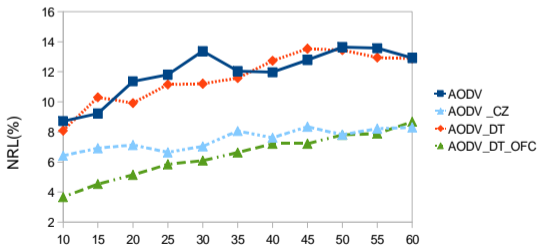

N° Connections  
(c)

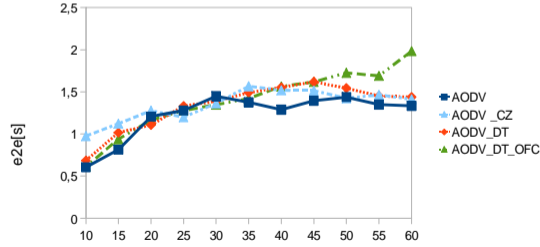

N° Connections  
(d)

Supplement: MOESM18 [file 11897560]
